# Supplementary material
Source: PubMed Central journal article supplement (PMC298755)

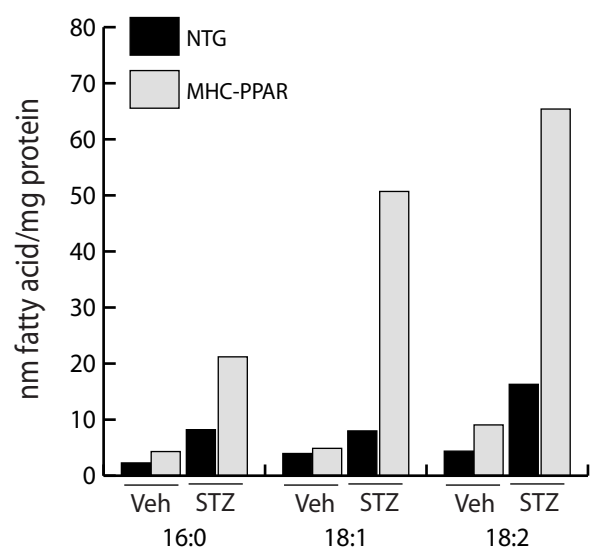

Supplement: pnas_0336724100_4.pdf [file pnas_0336724100_4.pdf]

MHC-PPAR  
Control

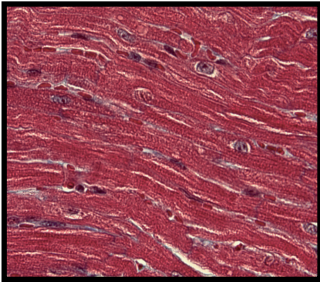

MHC-PPAR  
HF

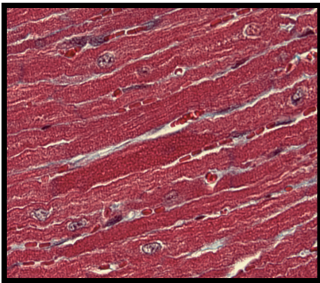

Supplement: pnas_0336724100_7.pdf [file pnas_0336724100_7.pdf]
